# Supplementary material for: Fusarium oxysporum Casein Kinase 1, a Negative Regulator of the Plasma Membrane H+-ATPase Pma1, Is Required for Development and Pathogenicity
Source: MDPI journal article supplement (doi:10.3390/jof8121300), 2022-12-15
Supplement: s1 [file s1]

**Supplementary Table S1.** List of primers used in this study. Lowercase nucleotides do not belong to the original sequence and were introduced to generate overlapping ends for fusion PCR reactions

| Gene                    | Name    | [Tm]_Sequence 5'→3'                                        |
|-------------------------|---------|------------------------------------------------------------|
| <i>hyg</i>              | HygG    | [62]_CGTTGCAAGACCTGCCTGAA                                  |
|                         | HygY    | [62]_GGATGCCTCCGCTCGAAGTA                                  |
| <i>phleo</i>            | Leo     | [62]_GCCACGAAGTGCACGCAGTT                                  |
|                         | Phe-5   | [62]_CGGAGCGGTTCGAGTTCTGG                                  |
| Casete <i>hyg/phleo</i> | gpdA15B | [62]_GGATCCCGAGACCTAATACAGCCCCCT                           |
|                         | trpC8B  | [62]_GGATCCAAACAAGTGTACCTGTGCATTC                          |
| <i>ck1</i>              | Ck1-1   | [62]_GAGGTAGGATTGGGTGCGAC                                  |
|                         | Ck1-2   | [62]_CACGGGAAGGGTTGAGAGAG                                  |
|                         | Ck1-3   | [62]_tttaccagaatgcacaggtacacttggtATTTAGGCGGCG<br>AAGGCGGT  |
|                         | Ck1-4   | [62]_tggtcgtttaggggctgtattaggtctcgTCATTGCTGCGG<br>CGTTGTGC |
|                         | Ck1-5   | [62]_TCATCGTGTCTGTTTCTCAGCG                                |
|                         | Ck1-6   | [62]_TCTGTTTCACCCCTTCGTCCA                                 |
|                         | Ck1-Fwd | [62]_GGCAAGAAGATTGGAGAGGG                                  |
|                         | Ck1-Rv  | [62]_CTCGCCATCCTCAACCTCG                                   |

|       |                                                                 |     |
|-------|-----------------------------------------------------------------|-----|
| YCK1  | ---MSMPIAS---TTLAVNNL-----TNINGNANFNVOAKQLHHQAVDSPARS           | 43  |
| YCK2  | MSQVQSPLTATNSGLAVNNNTMNSQMPNRSNVRLVNGTLPPSLHVSSNLN-----         | 50  |
| Cnck1 | -----MATTHVIG-----                                              | S   |
| MoCk1 | -----                                                           | 0   |
| FoCk1 | -----                                                           | 0   |
| VdCk1 | -----                                                           | 0   |
| YCK1  | SMTATTAAANSNSNRDDSTIVGLHYHGIKGIKIGEGSGFVLFGFTGNMINGVPVAIKFEPRK  | 103 |
| YCK2  | HNTGNSASYSQGSRRDSTIVGLHYHGIKGIKIGEGSGFVLFGFTGNMINGLPAIKFEPRK    | 110 |
| Cnck1 | SN-PGGHLTASGHSSSSSNIYGVHYKVGKIKIGEGSGFVIFEGTNLNSQTVAIKFEPRK     | 68  |
| MoCk1 | -----MASSSSNVGVHYRVGKIKIGEGSGFVIFEGTNLNSQTVAIKFEPRK             | 47  |
| FoCk1 | -----MASSSSNVGVHYRVGKIKIGEGSGFVIFEGTNLNNQVVAIKFEPRK             | 47  |
| VdCk1 | -----MASSSSNVGVHYRVGKIKIGEGSGFVIFEGTNLNNQVVAIKFEPRK             | 47  |
|       | :.****.***:*****:*****:****.***:*****:                          |     |
| YCK1  | TEAPQLRDEYTKYKILNGTNPINPYYFQGEGLHNILVIDLLGPSLEDLFDWCGRRKFSVK    | 163 |
| YCK2  | TEAPQLRDEYRTYKILAGTPGIPQEEYFQGEGLHNILVIDLLGPSLEDLFDWCGRRKFSVK   | 170 |
| Cnck1 | SDAPQLRDEYRSYKILSGCLGIPQVYFQGEGLHNILVIDLLGPSLEDLFDWCGRRKFSVK    | 128 |
| MoCk1 | SDAPQLRDEYRTYKILVCGCPINPYYFQGEGLHNILVIDLLGPSLEDLFDHCNRRFTIK     | 107 |
| FoCk1 | SDAPQLRDEYRTYKILVCGCPINPYYFQGEGLHNILVIDLLGPSLEDLFDHCNRRFTIK     | 107 |
| VdCk1 | SDAPQLRDEYRTYKILVCGCPINPYYFQGEGLHNILVIDLLGPSLEDLFDHCNRRFTIK     | 107 |
|       | :.****.***:****.*** *****:*****:*****.*.***:                    |     |
| YCK1  | TVVQVAVQMITLIEDLHAHLDIYRDIKPNDFLIGRPGQPDANNIHLIDFGMAKYRDPKT     | 223 |
| YCK2  | TVVQVAVQMITLIEDLHAHLDIYRDIKPNDFLIGRPGQPDANKVHLIDFGMAKYRDPKT     | 230 |
| Cnck1 | TCMTAKQMLSRVQTHEKNLIYRDIKPNDFLIGRPSKNAHLIHVDFGMAKYRDPKT         | 188 |
| MoCk1 | TVVMVAKQMLSRVQTHEKNLIYRDIKPNDFLIGRPGTKAANVIHVDFGMAKYRDPKS       | 167 |
| FoCk1 | TVVMVAKQMLSRVQTHEKNLIYRDIKPNDFLIGRPGTKASSVIHVDFGMAKYRDPKT       | 167 |
| VdCk1 | TVVMVAKQMLSRVQTHEKNLIYRDIKPNDFLIGRPGTKAANVIHVDFGMAKYRDPKT       | 167 |
|       | *.***:.*:*****:*****.***:*****:*****:                           |     |
| YCK1  | KQHIPYREKKSLSGTARYMSINTHLGREQSRDDMEALGHVFFYFLRGHLPWQGLKAPNN     | 293 |
| YCK2  | KQHIPYREKKSLSGTARYMSINTHLGREQSRDDMEAMGHVFFYFLRGHLPWQGLKAPNN     | 280 |
| Cnck1 | KQHIPYREKKSLSGTARYMSINTHLGREQSRRDDLEALGHVFFYFLRGHLPWQGLKAATN    | 248 |
| MoCk1 | KQHIPYREKKSLSGTARYMSINTHLGREQSRRDDLEALGHVFFYFLRGHLPWQGLKAATN    | 227 |
| FoCk1 | KQHIPYREKKSLSGTARYMSINTHLGREQSRRDDLEALGHVFFYFLRGHLPWQGLKAATN    | 227 |
| VdCk1 | KQHIPYREKKSLSGTARYMSINTHLGREQSRRDDLEALGHVFFYFLRGHLPWQGLKAATN    | 227 |
|       | *****:*****:*****:*****.***:*****:*****.*                       |     |
| YCK1  | KQKYEKGKRRSTNVYDLAQGLPQFGRYLEIVRSLFEECPDYEYGRKLLSVLDDLGL        | 343 |
| YCK2  | KQKYEKGKRRSTNVYDLAQGLPQFGRYLEIVRSLFEECPDYEYGRMLLSVLDDLGL        | 350 |
| Cnck1 | KQKYEKGKQKQTPTAELVEGYNPFESIYLNYYRKLTFDETPDYVFLRGLFDLALSNSG      | 388 |
| MoCk1 | KQKYEKGKQKQTAKELCEGFPQFEKYLTYVRNLGFEDTPDYVFLRGLFDTQALKESSG      | 287 |
| FoCk1 | KQKYEKGKQKQTAKDLCEGFPESKYLTYVRNLGFEDTPDYVFLRGLFDTQALKNTG        | 287 |
| VdCk1 | KQKYEKGKQKQTARDLCEGFPDELNKYLTIVRNLGFEDTPDYVFLRGLFDTQALKNTG      | 287 |
|       | *****:.*:.*:***:.* ** ***:***:***:***:.*:.*:*                   |     |
| YCK1  | ETADGQYDWMKLND--GRGDWLINKNKPNLHG--GHPNPPEKSRKHNRKLQMQQLQM       | 399 |
| YCK2  | ETADGQYDWMKLND--GRGDWLINKNKPNLHG--GHPNPPEKSKRHNRKHWQYSSPDH      | 406 |
| Cnck1 | EMDDGVYDWMMLNN--GGGWEASGRQSAQAE-----TARHN-----TRGR              | 347 |
| MoCk1 | GVDEGEYDWMKVSKDKKNDWDRQ-----AMHNPSQVRGASNLMLHGAS-----RGAH       | 334 |
| FoCk1 | EVEDGEYDWMKISKDSGKGWDS--KSHSGAYLHNPNRPGPSQMLHSGH-----RPGN       | 339 |
| VdCk1 | EVEDGEYDWMKISKDSGKGWDSKGHNNAHLHNPNRPGPSQMLHSGQ-----RGGA         | 340 |
|       | ** ****.***:                                                    |     |
| YCK1  | QQ-----LQQQQQQQYVA-QKTEADMRNSQYKPKL                             | 428 |
| YCK2  | HHHYNQOQQOQOQAQAQAQAQVQQOQLQQAQAQQOQANRYQLQPDSDHYDEEREASKL      | 466 |
| Cnck1 | DREYRDRVDKLR-----NG-----SAAN-----QPSPGKPRK-----SGSA             | 378 |
| MoCk1 | ATSLDRPPRARLT-----VDR-----LNAA-----QPPPPSPITKAN-QGKD            | 368 |
| FoCk1 | TTD-HQQAQNLTL-----VGR-----LNAA-----QPPPPSPITKMGKQRD             | 373 |
| VdCk1 | SAA-HAQAQNLTL-----VSR-----LNAA-----QPPPPSPITKMQNK--G            | 372 |
|       | :                                                               |     |
| YCK1  | DPTS YEAYQHQTQKYQLQEQQKRQQQQQLQEQQLEQQQLQQOQQQQQQQLRATGQPPSPQ   | 488 |
| YCK2  | DPTS YEAYQQQTQKYQAQQQKQMQKSKQF-----ANTGAGQNTN-----              | 507 |
| Cnck1 | LPNVSN-----QAM-----VGVS-----PSPLPQSRRSQ                         | 394 |
| MoCk1 | LRNAPGAIMASRG-----T-AGG-----LRDMATPTGSTQ                        | 407 |
| FoCk1 | RPSAPGALSAQRG-----SGVG-----LRDMATPTGSTQ                         | 403 |
| VdCk1 | RPNAPGALGAQRS-----SGVG-----LRDMATPAGSTQ                         | 402 |
| YCK1  | AQTQSQQFGARYQPQQQPSA-----ALRTEQHPNDNSSLAAHSKGGFFQKLGGC----      | 538 |
| YCK2  | -----KYPYNAQPTA-----NDEQN-AKNAQDRNKSXGKFFSLKGLCC-----           | 546 |
| Cnck1 | QAVQSQ-----AGLQPISPMNVNSRGGTANASQ-QLGEGDYHNSKNGGFRITTCGFR       | 459 |
| MoCk1 | AQFQNS-----TQNLQPRPMH-----QQSNMTQPQL--NNGRPAEPEPTGFQKFMKVLCCG-- | 446 |
| FoCk1 | AQFQNS-----AQNLPPQPT--SQQQAQPAQ--ASQQAQNPQSGQKFMKVLCCG--        | 453 |
| VdCk1 | AQFQNS-----ARNLQPTAT--SQQQAQPAQ--PSRGSPEPQPSGQKFMKVLCC--        | 448 |

**Supplementary Figure S1.** Amino acid sequence alignment of the *Yck1* (YHR135C) and *Yck2* (YNL154C) proteins from *S. cerevisiae* with Ck1 proteins from *C. neoformans* (CNA05390), *M. oryzae* (MGG\_08097), *F. oxysporum* Ck1 (FOXG\_05428) and *V. dahliae* (VDAG\_08537).

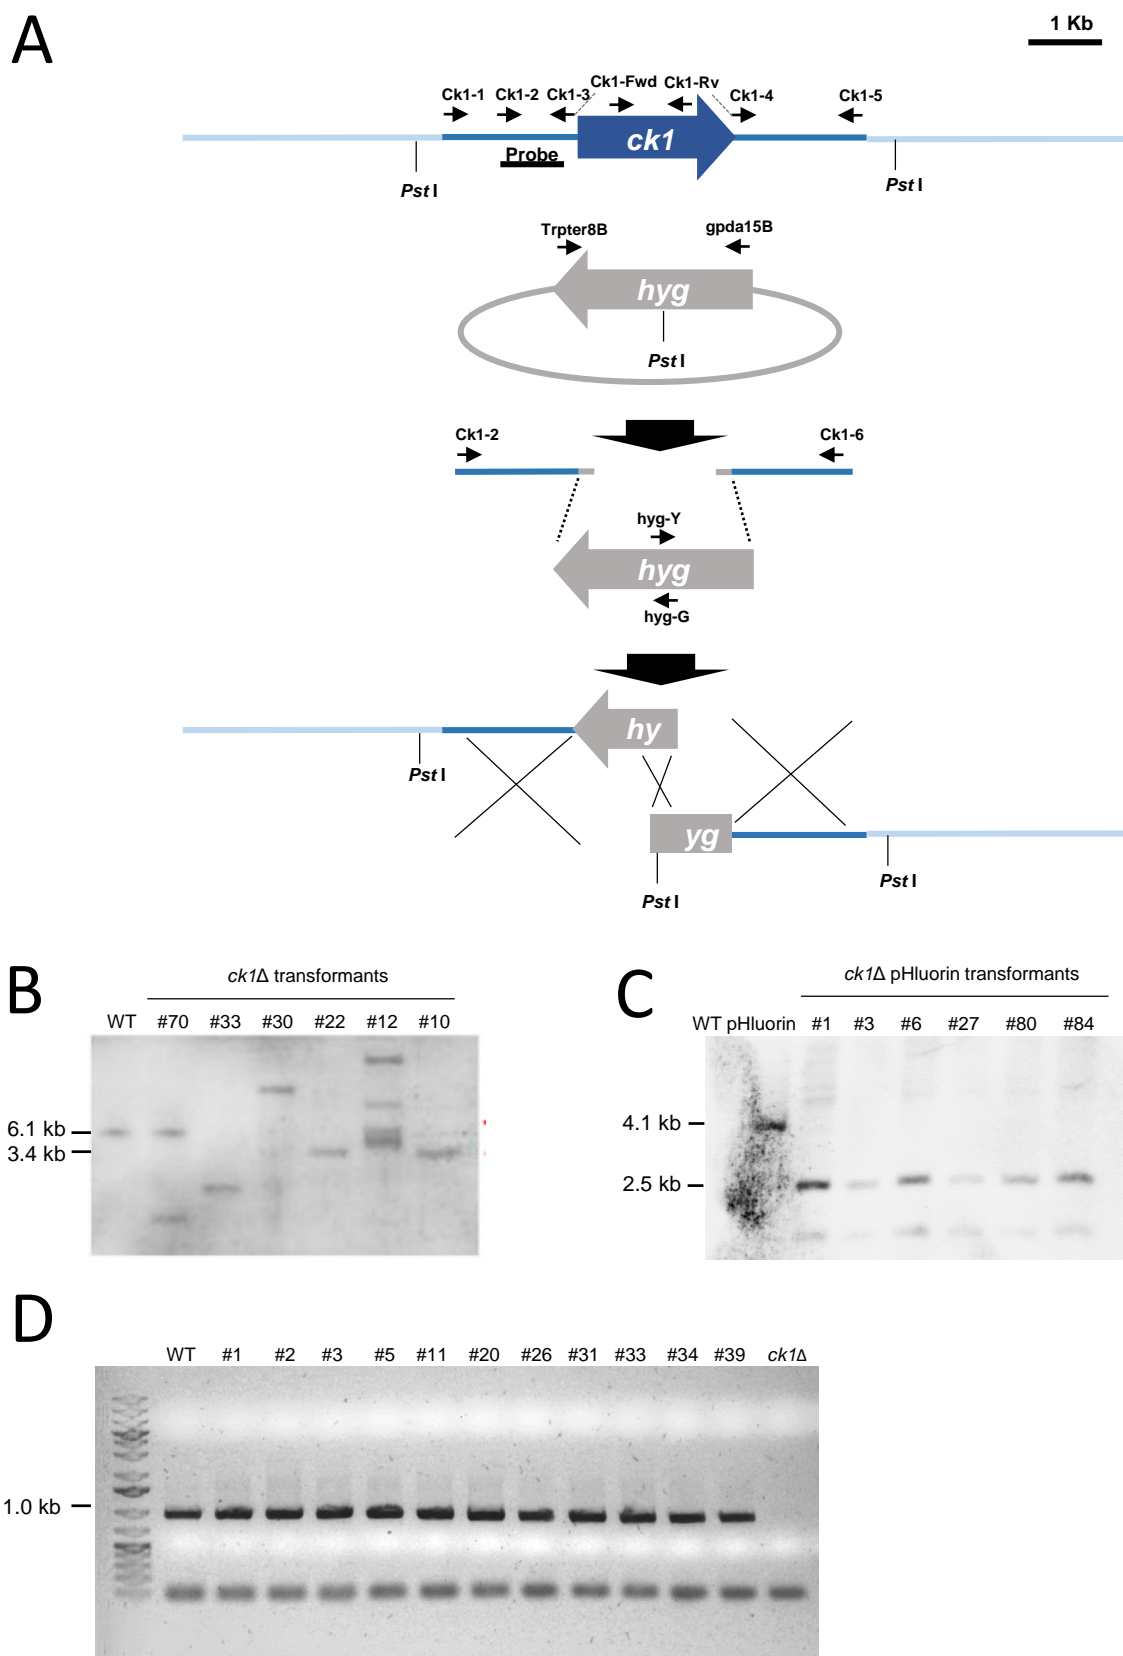

**Supplementary Figure S2.** Targeted replacement of the *ck1* gene in the *F. oxysporum* wild type and pHluorin-expressing strain (**A**) Physical maps of the *F. oxysporum ck1* locus and of the split-marker gene replacement constructs obtained by fusion PCR. Relative positions of restriction sites and PCR primers are indicated. *hyg*, hygromycin resistance gene. (**B**) Southern blot analysis of genomic DNA of the wild type strain (WT) and six independent transformants, treated with *Pst* I, separated on a 0.7% agarose gel, transferred to a nylon membrane and hybridized with the DNA probe indicated in (A). (**C**) Southern blot analysis of genomic DNA of the pHluorin-expressing background strain (pHluorin) and six independent transformants, treated with *Nsi* I, separated on a 0.7% agarose gel, transferred to a nylon membrane and hybridized with the DNA probe indicated in (A). (**D**) PCR amplification of genomic DNA of the WT, the *ck1Δ* and eleven independent complemented transformants, using primers Ck1-Fwd and Ck1-Rv indicated in (A).

**A**

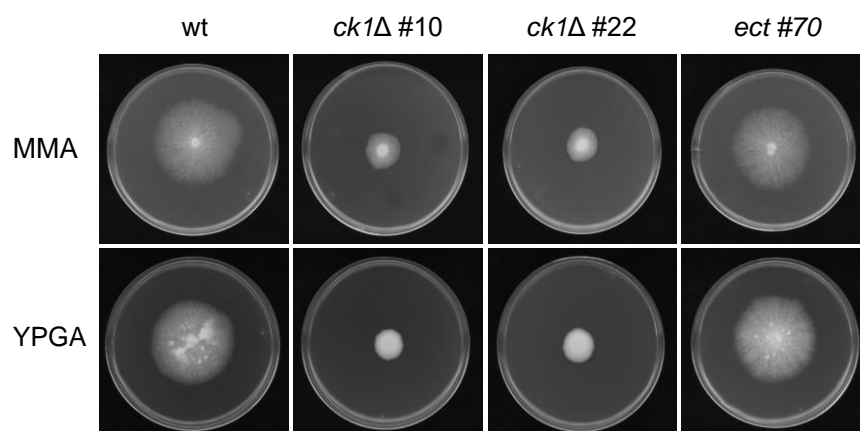

**B**

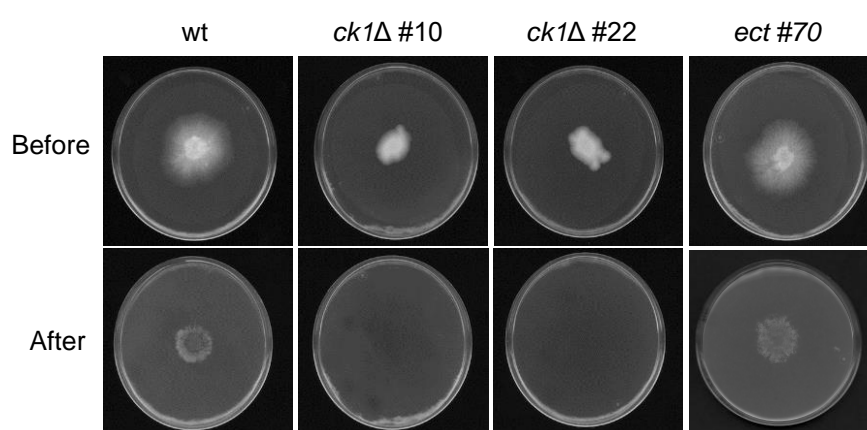

**C**

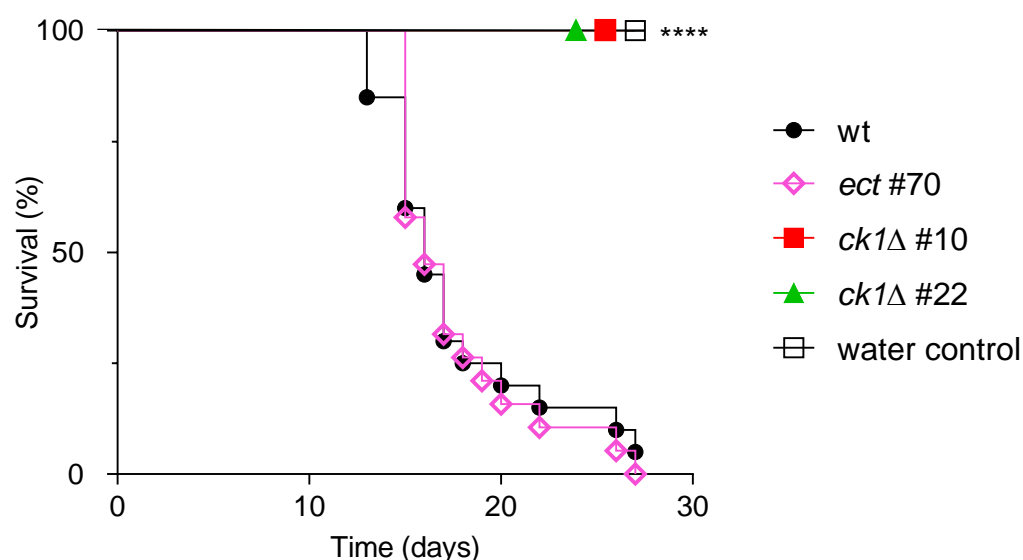

**Supplementary Figure S3.** Ck1 is required for growth, invasion and pathogenicity of *F. oxysporum*. **(A)** Aliquots of  $5 \times 10^4$  fresh microconidia of the indicated strains were spot-inoculated on MMA or YPGA plates. Colonies were imaged 3 days after inoculation. **(B)** Aliquots of  $5 \times 10^4$  fresh microconidia of the indicated strains were spot-inoculated on the top cellophane membranes placed on unbuffered MMA plates. Colonies were imaged 3 days after inoculation (before), then the cellophane membrane with the fungal colony was removed and plates were incubated for an additional day to visualize the presence on the plate, indicative of penetration through the cellophane (after). **(C)** Kaplan-Meier plots showing survival of tomato plants (cv. Moneymaker) inoculated by dipping roots into a suspension of  $5 \times 10^6$  fresh microconidia/mL of the indicated fungal strains. Survival of tomato plants was recorded for 27 days. Twenty plants were used per treatment.  $p < 0.0001$  (\*\*\*\*) versus wt according to log-rank test. All data shown are from one representative experiment. Experiments were performed twice with similar results.

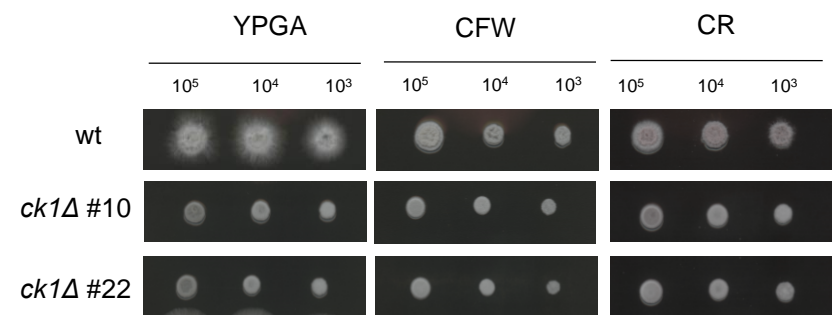

**Supplementary Figure S4.** Ck1 is not required for the response of *F. oxysporum* to cell wall stress. Aliquots of 10<sup>5</sup>, 10<sup>4</sup> and 10<sup>3</sup> fresh microconidia of the indicated strains were spot-inoculated on YPGA plates in the absence or presence of 50μg/ml Calcofluor White (CFW) or 100μg/ml Congo Red (CR). The plates were imaged after two days of incubation at 28°C. Images are from one representative experiment. Experiments were performed twice, each with three independent plates per growth condition.

|                   |                                                                       |     |
|-------------------|-----------------------------------------------------------------------|-----|
| S.cerevisiae      | MTDTSSSSSSSSASSV--S-----AHQPTQEKPAK--TYDDAASESSDDDDIDALIE-            | 48  |
| V.dahliae         | MA--ESNSAAAPALNTPIESHRFEKDRPLDTGVDAP--VKPKVEEEDEDEDIDALIE-            | 55  |
| M.oryzae          | MADSTQPTGAGPAINTPIESGKFDEKEGLAHNPAAKP--K---VADEEEDEDEDIDALIE-         | 54  |
| N.crassa          | MA--DHSASGAPALSTNIESGKFDEKAAEAAAYQPKP--K----VEDDEDEDIDALIE-           | 50  |
| T.reesei          | MA--DDKAVGAPALDTNIESGNFDEKRAQAPAGVPP--K-KAPAEEEDEDEDIDALIE-           | 53  |
| F.graminearum     | MA--EEKAVGAPALDTNIETGGFDEKRGQAP-ATHNP--K-APVAEDEEPDEDMDALIE-          | 53  |
| F.oxysporum       | MA--EEKAAGAPALDTNIETGGFDEKRGQAPPPTHAP--K-APVAEDEEPDEDMDALIE-          | 54  |
| F.verticillioides | MA--EEKATGAPALDTNIETGGFDEKRGQAAPPTHAP--K-APVAEDEEPDEDMDALIE-          | 54  |
| C.neoformans      | MGLTNR-----KNHKKDPEAGDPETEAKRQ-EEDKKKKYSGEEDVLLKY                     | 44  |
| A.nidulans        | MAERKI-----SYA-ADVENDHS-----RPTDVNDSAGLDEYGALNRY                      | 38  |
| Z.triciti         | MAAPRV-----SFSDKDLENEGGPERSRKWSQAPGNIEDLDEYALQKY                      | 45  |
|                   | * . : . *                                                             |     |
| S.cerevisiae      | --ELQSNH--GVDD-----EDSDNDGPVAAAGEARVPPEEYLQTDPSYG                     | 87  |
| V.dahliae         | --DLESQD--GHE-----E-DE-EETAVGGARVIPEDQLATDTRLG                        | 92  |
| M.oryzae          | --DLESVD--GHGD-----LEEE-EEEAGPGAARVIPEDLLQTSTRTG                      | 92  |
| N.crassa          | --DLESHD--GHD-----AEEE-EEATPGGGRRVPEDMLQTDTRVG                        | 87  |
| T.reesei          | --DLESED--GHA-----FDDE-EETNPATGRVVPEDMLQTD SRLG                       | 90  |
| F.graminearum     | --DLESED--GHE-----IDDD-E-EATPGGGRRVPEDQLQTD SRVG                      | 89  |
| F.oxysporum       | --DLESED--GHA-----FDDE-E-ETQPGGGRRVPEDQLQTD SRVG                      | 90  |
| F.verticillioides | --DLESED--GHA-----FDDE-E-ETQPGGGRRVPEDQLQTD SRVG                      | 90  |
| C.neoformans      | VADQQEIKKGGGDDKEDEENVKYIRKWYTPWKTKV---ETGGKKVPPDWLGTDRQKG             | 101 |
| A.nidulans        | ISTARDNRR-GSTSSA-GALSMKQKKKPWYKFwak-AGGENGEEGFVAPEDWLETDL-NG          | 94  |
| Z.triciti         | ISTYRDPKL-AQQQDEVANAHAESQKKKPWQ-FWKAPKAEDDGDAMVVPEDWLNADIRQG          | 103 |
|                   | . . . * : * : . *                                                     |     |
| S.cerevisiae      | LTSDEVLRKKKYGLNQMADEKESLVVKFVMFFVGPIQFVMEAAAILAAGLSDWVDFGVI           | 147 |
| V.dahliae         | LTEAEVLNRRRKYGANQMKEEKENLILKFFVME-----SRCPSSAAGLEDWVDFGVI             | 144 |
| M.oryzae          | LTEQEVQARRRKYGLNQMKEEKENLIMKFLGYFIGVPQFVMEAAVILAAGLQHWVDFAVI          | 152 |
| N.crassa          | LTSEEVVQRRRKYGLNQMKEEKENHFLKFLGFFVGPIQFVMEGAAVLAAGLEDWVDFGVI          | 147 |
| T.reesei          | LTEAEVLARRRKYGLNQMKEEKENLVKFLGFFIGPIQFVMEAAAVLAAGLQDWVDFGVI           | 150 |
| F.graminearum     | LTEAEVIARRKKWGLNAMKEEQENMILKFLMFFVGPIQFVMEAAAVLAAGLEDWIDFGVI          | 149 |
| F.oxysporum       | LTEAEVINRRRKWGLNQMKEERENMILKFLMFFVGPIQFVMEAAAVLAAGLEDWIDFGVI          | 150 |
| F.verticillioides | LTEAEVINRRRKWGLNQMKEERENMILKFLMFFVGPIQFVMEAAAVLAAGLEDWIDFGVI          | 150 |
| C.neoformans      | LSSSEIEERRKHSGWNELESPNENQFLKISYFRGPILYVME LAVILAAGLRDWIDFGVI          | 161 |
| A.nidulans        | LPSSQIEPRRKRGGWNELTTEKTNFFVQFIGYFRGPILYVME LAVLLAAGLRDWIDLGVI         | 154 |
| Z.triciti         | ITNADVESRRKKFGWNEISTDKENLFKFLTFTGPILYVME LAVLLAAGLRDWIDFGVI           | 163 |
|                   | : . : . ** : . * * : . . . : * . . . **** * : . : *                   |     |
| S.cerevisiae      | CGLLMLNAGVGFVQEFQAGSIVDELKKT LANTAVVIRDGQLVEIPANEVVPGDILQLEDG         | 207 |
| V.dahliae         | IALLLLNAVVGfyQEFQAGSIVDELKKT LALKAVVLRDGLKEVEAHEVVPGDILQVEDG          | 204 |
| M.oryzae          | CALLLLNACVGFQEFQAGSIVDELKKT LALKAVVLRDGLKEVEAHEVVPGDILQVEEG           | 212 |
| N.crassa          | CGLLLLNAVVGfyQEFQAGSIVDELKKT LALKAVVLRDGLTKEIEAHEVVPGDILQVEEG         | 207 |
| T.reesei          | CGLLMLNACVGFQEFQAGSIVDELKKT LALKAVVLRDGLTKEIEAHEVVPGDILQVEEG          | 210 |
| F.graminearum     | CALLLLNACVGFQEFQAGSIVDELKKT LALKAVVLRDGLTKEIEAHEVVPGDILQVEEG          | 209 |
| F.oxysporum       | CALLLLNACVGFQEFQAGSIVDELKKT LALKAVVLRDGLTKEVEAHEVVPGDILQVEEG          | 210 |
| F.verticillioides | CALLLLNACVGFQEFQAGSIVDELKKT LALKAVVLRDGLTKEVEAHEVVPGDILQVEEG          | 210 |
| C.neoformans      | IGILFLNAGVGWYQEKQAGDIVAQLKAGIALKADVIRDGKEQEIEARELVPGDILVLEEG          | 221 |
| A.nidulans        | IGILMLNAVVGWYQEKQADVVASLKGDIAMKAVVKRDGQEQEILARELVTGDIVVIEEG           | 214 |
| Z.triciti         | IAILLNAAVVGWYQEKQADVVASLKGDIAMKATVVRDGGQEQDIKARELVPGDIVVIEEG          | 223 |
|                   | . : * : *** ** : ** ** . : * . ** : * . * * * * : : * * : * * : * : * |     |
| S.cerevisiae      | TVIPTDGRIVTED-----CFL                                                 | 223 |
| V.dahliae         | TIIPADGRIVTDD-----AFL                                                 | 220 |
| M.oryzae          | TIIPADGRIVTDD-----AYL                                                 | 228 |
| N.crassa          | TIIPADGRIVTDD-----AFL                                                 | 223 |
| T.reesei          | TIIPADGRIVTEG-----AFL                                                 | 226 |
| F.graminearum     | TIIPADGRFVTEG-----CFC                                                 | 225 |
| F.oxysporum       | TIIPADGRFVTEG-----CFV                                                 | 226 |
| F.verticillioides | TIIPADGRFVTEG-----CFV                                                 | 226 |
| C.neoformans      | KTIAADAKIIGDYEDKDGSKSDIL-DRV--EKSKHSGKGDDDD-----EDDGPDKGPSLC          | 274 |
| A.nidulans        | TIVPADVRLICDYDKPETYETYKEYLATANDDTLKE----NDDDDDDHGI EARLGVS LV         | 269 |
| Z.triciti         | QSVPADSRLICDYEPEDFEKYKELREQHALNPEEDPAGSEDAEGEGEGE- IQHQGHSII          | 282 |
|                   | : : * : : :                                                           |     |





|                    |                                                                           |     |
|--------------------|---------------------------------------------------------------------------|-----|
| T.reesei           | ARKRGE GAW E ILGIMPCSDPPRHDTARTINEAKQLGLSIKMLTGD AVGIARETSRQLGLG          | 578 |
| F.graminearum      | ARKRGE GAW E ILGIMPCSDPPRHDTARTINEAKRLGLSIKMLTGD AVGIARETSRQLGLG          | 577 |
| F.oxysporum        | ARKRGE GAW E ILGIMPCSDPPRHDTARTINEAKRLGLSIKMLTGD AVGIARETSRQLGLG          | 578 |
| F.verticilliioides | ARKRGE GAW E ILGIMPCSDPPRHDTARTINEAKRLGLSIKMLTGD AVGIARETSRQLGLG          | 578 |
| C.neoformans       | AVKEEGKDWE LLGMLCMFDP RPVD TAKTIGE AHD LGIQVKMLTGD AVAI AKETCKQLGLK       | 626 |
| A.nidulans         | AVQKEGEPWQL LGMPYMFDP RPRED TAHTIAEAQH LGLSVKMLTGD ALAI AKETCKMLALS       | 623 |
| Z.triciti          | AYQKNNDPWVLLGMLS MFDPPREDTAQTII EAQQLGVPVKMLTGD ALAI AKETCKMLALG          | 636 |
|                    | * : * : * : * : * : * : * : * : * : * : * : * : * : * : * : * : * : * : * |     |
| S.cerevisiae       | TNIYNAERLGLGGGGDMPGSELADFVENADGFAEVFPQH KYRVVEILQNRGYLVAMTGDG             | 635 |
| V.dahliae          | TNIFNADRLGLGGGGDMPGSEVYDFVEAADGFAEVFPQH KYNVVEILQQRGYLVAMTGDG             | 632 |
| M.oryzae           | TNVYNAERLGLGGGGDMPGSEVYDFVEAADGFAEVFPQH KYNVVEILQQRGYLVAMTGDG             | 640 |
| N.crassa           | TNIYNAERLGLGGGGDMPGSEVYDFVEAADGFAEVFPQH KYNVVEILQQRGYLVAMTGDG             | 635 |
| T.reesei           | TNVYNAERLGLGGGGDMPGSEVYDFVEAADGFAEVFPQH KYSVVEILQQRGYLVAMTGDG             | 638 |
| F.graminearum      | TNVYNAERLGLGGGGDMPGSEVYDFVEAADGFAEVFPQH KYNVVEILQQRGYLVAMTGDG             | 637 |
| F.oxysporum        | TNVYNAERLGLGGGGDMPGSEVYDFVEAADGFAEVFPQH KYNVVEILQQRGYLVAMTGDG             | 638 |
| F.verticilliioides | TNVYNAERLGLGGGGDMPGSEVYDFVEAADGFAEVFPQH KYNVVEILQQRGYLVAMTGDG             | 638 |
| C.neoformans       | TNVYDSEK LIG --- GGMAGSDI RHD FVEAADGFAEVFPEHKYQVVNLLQERGH LTAMTGDG       | 683 |
| A.nidulans         | TKVYDSERLIH --- GGLAGSAQI RDLVEKADGFAEVFPEHKYQVVEM LQQRGH LTAMTGDG        | 680 |
| Z.triciti          | TKVYNSQK LIH --- GGLSGT TQHD LVERADGFAEVFPEHKYQVVEM LQQRGH LTAMTGDG       | 693 |
|                    | * : : : : : * * : * : * : * : * : * : * : * : * : * : * : * : * : * : *   |     |
| S.cerevisiae       | VNDAPSLKKADTGIAVEGATDAARSAADIVFLAPGLSAIIDALKTSRQIFHRMYSYVVYR              | 695 |
| V.dahliae          | VNDAPSLKKADTGIGMFDVPRSST -----VSILP                                       | 661 |
| M.oryzae           | VNDAPSLKKADTGIAVEGASDAARSAADIVFLAPGLGAIIDALKTSRQIFHRMAYVVYR               | 700 |
| N.crassa           | VNDAPSLKKADTGIAVEGSSDAARSAADIVFLAPGLGAIIDALKTSRQIFHRMAYVVYR               | 695 |
| T.reesei           | VNDAPSLKKADTGIAVEGASDAARSAADIVFLAPGLGAIIDALKTSRQIFHRMAYVVYR               | 698 |
| F.graminearum      | VNDAPSLKKADTGIAVEGASDAARSASDIVFLAPGLGAIIDALKTSRQIFHRMAYVVYR               | 697 |
| F.oxysporum        | VNDAPSLKKADTGIAVEGASDAARSASDIVFLAPGLGAIIDALKTSRQIFHRMAYVVYR               | 698 |
| F.verticilliioides | VNDAPSLKKADTGIAVEGASDAARSADIVFLAPGLGAIIDALKTSRQIFHRMAYVVYR                | 698 |
| C.neoformans       | VNDAPSLKKADCGIAVEGASDAARTAADVVFLDEGLSTIITAIKVARQIFHRMKAYIIYR              | 743 |
| A.nidulans         | VNDAPSLKKADCGIAVEGSTEAQAADIVFLAPGLSTIVDAIKLARQIFQRMKAYIQYR                | 740 |
| Z.triciti          | VNDAPSLKKADCGIAVEGSSEAQAADIVFLAPGLSTIVFAIKTARQIFQRMKAYIQYR                | 753 |
|                    | ***** * : . :                                                             |     |
| S.cerevisiae       | IALSLHLEIFLGLWIAI LDNSLDIDLIVFIAIFADVATLAIAYDNAPYSPKPVKWNLPRL             | 755 |
| V.dahliae          | LTRSQLSKLYLGLWIAI LNRS LNIELVVFIAIFADIATLAIAYDNAPYSKAPVKWNLPKL            | 721 |
| M.oryzae           | IALSIHLEIYLGILIAALNQSLNINLVAFIAIFADIATLAIAYDNAPYSKSPVKWNLPKL              | 760 |
| N.crassa           | IALSIHLEIFLGLWIAI LNRS LNIELVVFIAIFADVATLAIAYDNAPYSQTPVKWNLPKL            | 755 |
| T.reesei           | IALSLHMEIFLGLWIAI LNRS LNIELVVFIAIFADIATLAIAYDNAPYSQTPVKWNLPKL            | 758 |
| F.graminearum      | IALSLHMEIFLGLWIAI LNRS LNIELVVFIAIFADIATLAIAYDNAPFSQTPVKWNLPKL            | 757 |
| F.oxysporum        | IALSLHMEIFLGLWIAI LNRS LNIELVVFIAIFADIATLAIAYDNAPFSQTPVKWNLPKL            | 758 |
| F.verticilliioides | IALSLHMEFFLGLWIAI LNKS LNIELVVFIAIFADIATLAIAYDNAPFSQTPVKWNLPKL            | 758 |
| C.neoformans       | IALCVHLEVYLMLSILIN ETIRVDLVVFLAIFADVATIAIAYDRAPYAHQPVEWQLPKV              | 803 |
| A.nidulans         | IALCIHLELYLVTSMIIN ETIKADLIVFIALFADLATIAYAYDNAHFARPVEWQLPKI               | 800 |
| Z.triciti          | IALCLHLEIYLVTSIII IREVIASELIVFIALFADLATVAIAYDNAHSEQRVVEWQLPKI             | 813 |
|                    | : : . : : * : : : : * : * : * : * : * : * : * : * : * : * : * : * : *     |     |
| S.cerevisiae       | WGMSIILGIVLAIGSWITLTTMFL -- PKGGIIQNFGAMNGIMFLQISLTENWLFITRAA             | 813 |
| V.dahliae          | WGISVILGIVLAIGTWITVTTMYAHGPNGGIVQNFGNLDEVVFLQVSLTENWLFITRAN               | 781 |
| M.oryzae           | WGMSVLLGVVLAIGTFITITTMFVHGEGGIVQNNQIDAVVFL EISLTENWLFITRAN                | 820 |
| N.crassa           | WGMSVLLGVVLAVGTWITVTTMYAQGENGGIVQNFNMDEVFLQISLTENWLFITRAN                 | 815 |
| T.reesei           | WGMSVLLGTVLAIGTWIATLTTMYAGGQNGGIVQNFGNIDEVVFL EISLTENWLFITRAN             | 818 |
| F.graminearum      | WGMSVLLGVVLAVGTWIALTTMLANSEGGIVQNF GK IDEVLFLEISLTENWLFITRAN              | 817 |
| F.oxysporum        | WGMSVLLGVVLAVGTWIALTTMYANSEGGIVQNF GK IDEVLFLEISLTENWLFITRAN              | 818 |
| F.verticilliioides | WGMSVLLGVVLAVGTWIALTTMYANSEGGIVQNF GK IDEVLFLEISLTENWLFITRAN              | 818 |
| C.neoformans       | WIISTIMGLLLAAGTWIIRATLWI -- DNGGIVQNF GSTQEILFLEVALTESWVIFITRLA           | 861 |
| A.nidulans         | WWISVVLGVLLAAGTWIMRASLFL -- ENGGIIQNFGSPQPMFLFVSLTENWLFIVTRGG             | 858 |
| Z.triciti          | WIISVILGIELAIATWIARGTFFM -- PGGGIIQNYGNFEEILFLEIALTENWLFITRGA             | 871 |
|                    | * : * : * * : : * : : * : * : * : : * : * : * : * : * : * : *             |     |
| S.cerevisiae       | GP -- FWSSIPSWQLAGAVFAVDIIATMFTLFGWWE -----NW-TDI                         | 852 |
| V.dahliae          | GP -- FWSSIPSWQLSGAIFIVDILATLFCIFGWFEH -----GQ-TSI                        | 820 |
| M.oryzae           | GP -- FWSSIPSWQLTGAIFFVVDIIASCFAIWGWVFG -----NKMTHI                       | 860 |
| N.crassa           | GP -- FWSSIPSWQLSGAIFLVDILATCFTIWGWFEH -----SD-TSI                        | 854 |
| T.reesei           | GP -- FWSSIPSWQLSGAILVVDIIATLFCVFGWFIG -----ED-TSI                        | 857 |
| F.graminearum      | GP -- FWSSIPSWQLSGAILIVDILATLFCIFGWVFG -----GQ-TSI                        | 856 |
| F.oxysporum        | GP -- FWSSIPSWQLSGAILIVDILATLFCIFGWVFG -----GQ-TSI                        | 857 |
| F.verticilliioides | GP -- FWSSIPSWQLSGAILIVDILATLFCIFGWVFG -----GQ-TSI                        | 857 |



|                   |                                                                |      |
|-------------------|----------------------------------------------------------------|------|
| C.neoformans      | QEPGTPNVWPSFQLVAAVIGVDALATIFALFGWISGDAP-----HGGWTDV            | 907  |
| A.nidulans        | -----KTWPSWQLVGAI FVVDVLATLFCVFGWLAGDYVETSPPS---QATFSTNNDDTI   | 909  |
| Z.triciti         | -----QTLPSWQLVGAILGVDILATLFCIFGWLNSSIYQRPLPSPMSTFQQTANGHTDV    | 925  |
|                   | . **:* **.*:: ** :*: * ::**                                    |      |
| S.cerevisiae      | VTVVRVWIWSIGIFCVLGGFYEMSTSEAFDRLMNGKPMKEKKSTRSVEDFMAAMQRVST    | 912  |
| V.dahliae         | VAVVRIWIFSFGVFCVCAGVYYILQDNAGFDNMMHGKSPKGSQKQRSLEDFVVS LQRVST  | 880  |
| M.oryzae          | VAVVRIWVFSFGVFCIMGGLYYILQDSQGF DNLMHGKSPKGNQKQRSLEDFVVS LQRVST | 920  |
| N.crassa          | VAVVRIWIFSFGIFCIMGVYYILQDSVGF DNLMHGKSPKGNQKQRSLEDFVVS LQRVST  | 914  |
| T.reesei          | VAVVRIWIFSFGIFAIMGGLYYFLQGSGTFDNLMHGKSPKQNKQRSLEDFVVS LQRVST   | 917  |
| F.graminearum     | VAVVRIWIFSFGVFCVMGGLYYFMQGSGTFDNLMHGKSPKQNKQRSLEDFVVS LQRVST   | 916  |
| F.oxysporum       | VAVVRIWIFSFGVFCVMGGLYYFMQGSGTFDNLMHGKSPKQNKQRSLEDFVVS LQRVST   | 917  |
| F.verticillioides | VAVVRIWIFSFGVFCVMGGLYYFMQGSGTFDNLMHGKSPKQNKQRSLEDFVVS LQRVST   | 917  |
| C.neoformans      | VTVVKIWCFSFGVVIILLVYLM LNSIRWLDHIGRKS R---SKKNEKLENFLTDLQRLTI  | 964  |
| A.nidulans        | VTVVWIWAYSIGVTIIIAVVYYLLTIIPALDNLGRKNR---SVVDTKVENLLNHLSKLAI   | 966  |
| Z.triciti         | VTVVVVWMFSIGVMIVIAITYYLLNKIPGLADLGRQNR---SLHDTQMENIIGHLSKLAL   | 982  |
|                   | *:** :* :*: *: : * : : : . . . . :*::: ::::                    |      |
| S.cerevisiae      | QHEKET*-----                                                   | 918  |
| V.dahliae         | QHEKSQ-----                                                    | 886  |
| M.oryzae          | QHEKSQ-----                                                    | 926  |
| N.crassa          | QHEKSQ-----                                                    | 920  |
| T.reesei          | QHEKSQ-----                                                    | 923  |
| F.graminearum     | QHEKSQ-----                                                    | 922  |
| F.oxysporum       | QHEKSQ-----                                                    | 923  |
| F.verticillioides | QHEKSQ-----                                                    | 923  |
| C.neoformans      | VHETDHNGSY Y-RFASKKEEESGDN GKKDDKKDEAKSADTKKQESNAKKGDDEKKKDD   | 1023 |
| A.nidulans        | EHEVDANGKSRYTLGARAEPEDDE-----                                  | 990  |
| Z.triciti         | KHERDENG DARWTLATKATDDEDD-----                                 | 1007 |
|                   | ** .                                                           |      |
| S.cerevisiae      | -----                                                          | 918  |
| V.dahliae         | -----                                                          | 886  |
| M.oryzae          | -----                                                          | 926  |
| N.crassa          | -----                                                          | 920  |
| T.reesei          | -----                                                          | 923  |
| F.graminearum     | -----                                                          | 922  |
| F.oxysporum       | -----                                                          | 923  |
| F.verticillioides | -----                                                          | 923  |
| C.neoformans      | GGKKGATGGDKGLSDQTGKGHEHAQAQGKGANEVQPDGTQPKPDDQSSEGT HVDPN      | 1079 |
| A.nidulans        | -----                                                          | 990  |
| Z.triciti         | -----                                                          | 1007 |
